# Supplementary material for: Inorganic molecule (O2, NO) adsorption on nitrogen- and phosphorus-doped MoS2 monolayer using first principle calculations
Source: Royal Society of Chemistry journal article supplement (doi:10.1039/c8ra07638c), 2018-01-01
Supplement: c8ra07638c1.pdf [file c8ra07638c1.pdf]

## **Inorganic molecules (O<sub>2</sub>, NO) adsorption on Nitrogen and Phosphorus doped MoS<sub>2</sub> monolayer using first principle calculations**

Hafiz Ghulam Abbas<sup>a\*</sup>, Tekalign Terfa Debela<sup>b</sup>, Sajjad Hussain<sup>c</sup>, Iftikhar Hussain<sup>d</sup>

<sup>a</sup> Department of Nanoscience and Nanotechnology, Research Institute of Physics and Chemistry, Chonbuk National University, Jeonju, Chonbuk 561-756, Republic of Korea

<sup>b</sup> Institute for Application of Advanced Material, Jeonju University, Chonju Chonbuk 55069, Republic of Korea

<sup>c</sup> Department of Nano and Advanced Materials Engineering, Sejong University, Seoul 143-747, Republic of Korea

<sup>d</sup> School of Chemical Engineering, Yeungnam University, Gyeongsan, Gyeongbuk 38541, Republic of Korea

\* E-mail: [ga32949@gmail.com](mailto:ga32949@gmail.com), [abbas@jbnu.ac.kr](mailto:abbas@jbnu.ac.kr)

## **Contents**

### **I. Supplementary Tables.**

**Table S1.** Adsorption energy of O<sub>2</sub> molecule to the N-doped and P-doped MoS<sub>2</sub> monolayer.

**Table S2.** Adsorption energy of NO molecule to the N-doped and P-doped MoS<sub>2</sub> monolayer.

**Table S3.** Relative energy of doped (4 × 4)MoS<sub>2</sub> monolayer for different configurations, respectively.

### **.II. Supplementary Figures**

**Figure S1.** The chemical structure for a different configuration of doped (4 × 4)MoS<sub>2</sub> monolayer.

**Figure S2.** The total electronic density of states (TDOS) and PDOS of (4 × 4)N-MoS<sub>2</sub>.

**Figure S3.** The total electronic density of states (TDOS) and PDOS of (4 × 4)P-MoS<sub>2</sub>

**Figure S4.** Band structure of pristine monolayer MoS<sub>2</sub> and (4 × 4)MoS<sub>2</sub>-O<sub>2</sub> complex.

**Figure S5.** Chemical structure of the 2N and 2P substituted (4 × 4)MoS<sub>2</sub>-2O<sub>2</sub> complex.

**Figure S6.** The total electronic density of states (TDOS) and PDOS of  $(4 \times 4)$ N-MoS<sub>2</sub>-O<sub>2</sub> complex system.

**Figure S7.** The PDOS of  $(4 \times 4)$ P-MoS<sub>2</sub>-O<sub>2</sub> complex.

**Figure S8.** Chemical structure of the 2N and 2P substituted  $(4 \times 4)$ MoS<sub>2</sub>-2NO complex.

**Figure S9.** The total electronic density of states (TDOS) and PDOS of  $(4 \times 4)$ N-MoS<sub>2</sub>-NO complex system.

**Figure S10.** The total electronic density of states (TDOS) and PDOS of  $(4 \times 4)$ P-MoS<sub>2</sub>-NO complex system.

**Table S1.** Adsorption energy ( $E_{ad}$ ) of the  $O_2$  gas molecule to the N and P substituted ( $4 \times 4$ )  $MoS_2$  monolayer for different configurations, P, V represents parallel and vertical orientations of the molecule, respectively.

| Configuration  | Absorbent          | Absorbate      | E <sub>ad</sub> (eV) <sup>a</sup> | E <sub>rel</sub> (eV) <sup>b</sup> |
|----------------|--------------------|----------------|-----------------------------------|------------------------------------|
| P <sub>1</sub> | N-MoS <sub>2</sub> | O <sub>2</sub> | -0.32                             | 0.00                               |
| V <sub>1</sub> | N-MoS <sub>2</sub> | O <sub>2</sub> | -0.29                             | 0.03                               |
| P2             | N-MoS <sub>2</sub> | O <sub>2</sub> | 1.67                              | 1.99                               |
| P <sub>1</sub> | P-MoS <sub>2</sub> | O <sub>2</sub> | -1.27                             | 0.00                               |
| V1             | P-MoS <sub>2</sub> | O <sub>2</sub> | -1.11                             | 0.16                               |
| P2             | P-MoS <sub>2</sub> | O <sub>2</sub> | -0.80                             | 2.07                               |

<sup>a</sup> The adsorption energy per gas molecule to the MoS<sub>2</sub> surface.

<sup>b</sup> Relative energy defined as the total energy of each configuration minus that of the most stable configuration A<sub>i</sub>.

**Table S2.** Adsorption energy ( $E_{ad}$ ) of NO gas molecule to the N and P substituted ( $4 \times 4$ )  $MoS_2$  monolayer for different configurations, P, V represents parallel and vertical orientations of the molecule, respectively.

| Configuration  | Absorbent          | Absorbate | E <sub>ad</sub> (eV) <sup>a</sup> | E <sub>rel</sub> (eV) <sup>b</sup> |
|----------------|--------------------|-----------|-----------------------------------|------------------------------------|
| P <sub>1</sub> | N-MoS <sub>2</sub> | NO        | -0.56                             | 0.00                               |
| V <sub>1</sub> | N-MoS <sub>2</sub> | NO        | -0.46                             | 0.09                               |
| P2             | N-MoS <sub>2</sub> | NO        | -0.09                             | 0.47                               |
| P <sub>1</sub> | P-MoS <sub>2</sub> | NO        | -1.44                             | 0.00                               |
| V <sub>1</sub> | P-MoS <sub>2</sub> | NO        | -1.42                             | 0.01                               |
| P <sub>2</sub> | P-MoS <sub>2</sub> | NO        | -0.64                             | 0.79                               |
| P <sub>3</sub> | P-MoS <sub>2</sub> | NO        | -0.36                             | 1.07                               |

<sup>a</sup> The adsorption energy per gas molecule to the MoS<sub>2</sub> surface.

<sup>b</sup> Relative energy defined as the total energy of each configuration minus that of the most stable configuration

**Table S3.** Relative energy of substituted ( $4 \times 4$ ) MoS<sub>2</sub> monolayer for different configurations, respectively.

| Configuration | Dopant | Erel (eV) <sup>b</sup> |
|---------------|--------|------------------------|
| A             | N      | 0.00                   |
| B             | N      | 0.005                  |
| C             | N      | 0.05                   |
| D             | N      | 0.36                   |
| A             | P      | 0.00                   |
| B             | P      | 0.37                   |
| C             | P      | 0.40                   |
| D             | P      | 0.43                   |

<sup>a</sup> The substituted Nitrogen and phosphorus atoms.

<sup>b</sup> Relative energy defined as the total energy of each configuration minus that of the most stable configuration

Tables S3 compares the relative stabilities of various configurations of the doped ( $4 \times 4$ ) MoS<sub>2</sub> monolayer and doping concentration ranges from 3.12% to 6.25% per MoS<sub>2</sub> unit, corresponding to  $N_D = 1-2$ , here  $N_D$  represents the number of impurity atoms. In this regard, we note that MoS<sub>2</sub> layer contains three sublayers, and impurities can only be entered in the upper and lower sublayers ( $U_U$ ,  $U_L$ ) occupied by sulfur atoms. Here,  $U_U$  and  $U_L$  denote the upper and lower sublayers of the MoS<sub>2</sub> layer, respectively. For  $N_D = 1$  value, the impurity atom doped into the center of the MoS<sub>2</sub> monolayer and model ensure that distance among the adjacent image is larger than 12.0 Å. However, for  $N_D = 2$  in configuration A, B impurity atom doped on  $U_U$  and other on  $U_L$  sublayers of the MoS<sub>2</sub> monolayer far away from the central atom to avoid interaction between the dopants and one S-Mo bond apart as shown in Fig. S1. On the other hand, in configuration C and D second impurities located on  $U_U$  sublayer of the MoS<sub>2</sub> are two and four S-Mo bonds apart from a central atom. The most stable configuration is referred to as A and it is more stable than the B, C, and D, irrespective of  $N_D$ . We used a most stable configuration in this work to study the adsorption of gas molecules. Based on this observation, configurations with higher defects concentrations can be generated in such a way to include as many S-Mo motifs as possible.

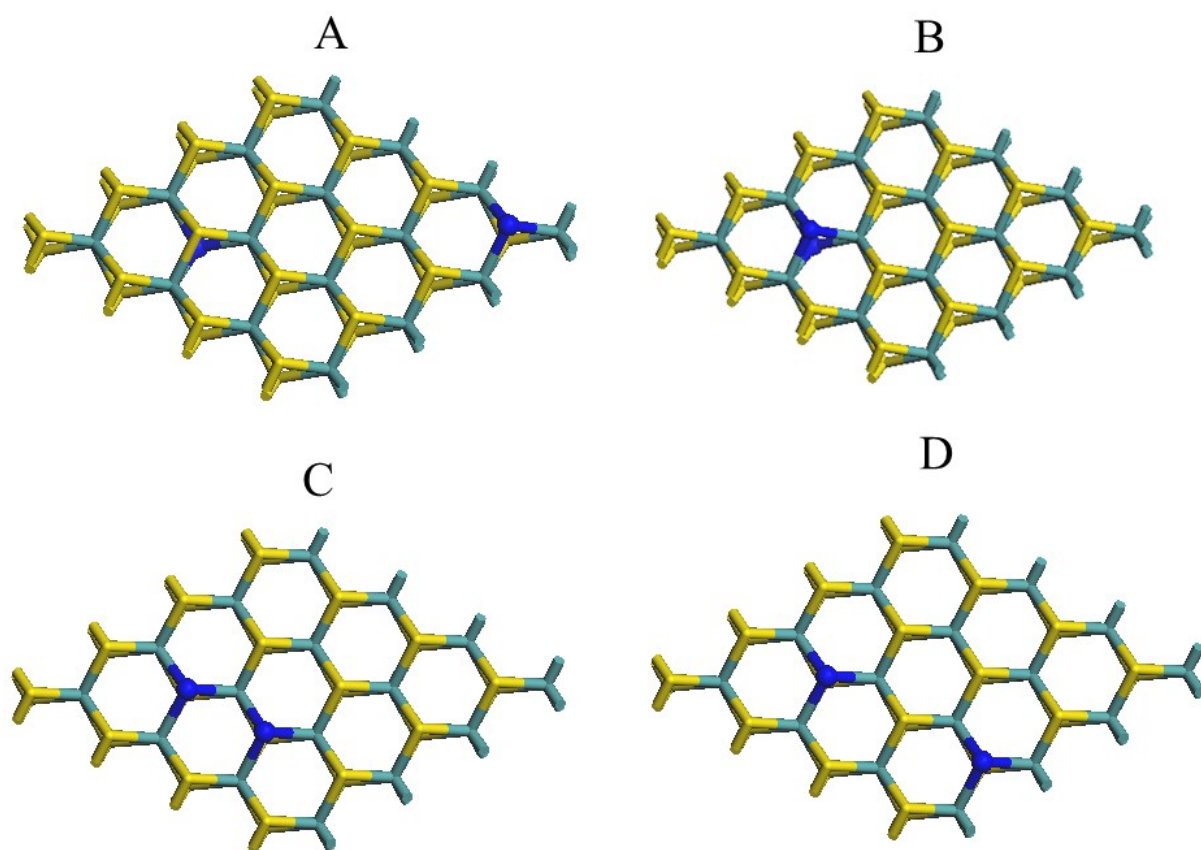

**Fig. S1.** The chemical structure for a different configuration of  $(4 \times 4)$  MoS<sub>2</sub> monolayer substituted with N atom, violet, yellow, and green sphere represent Mo, S, and N atoms, respectively.

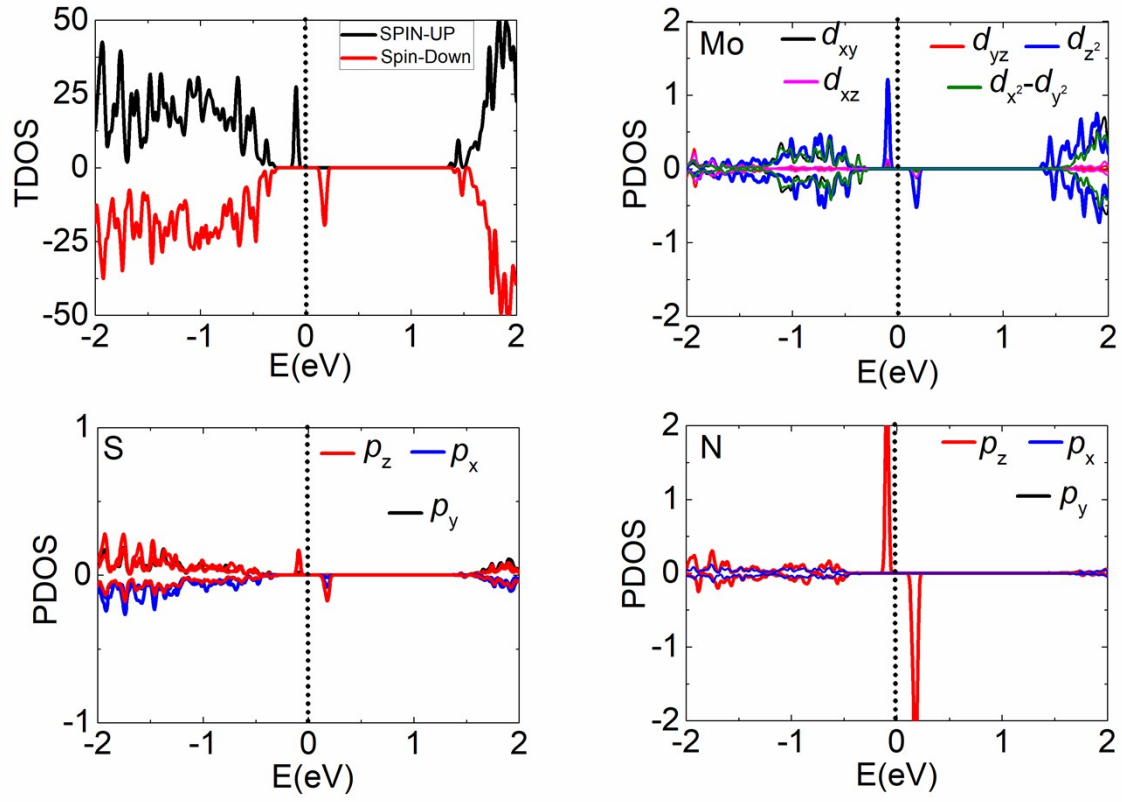

**Fig. S2.** The total electronic density of states (TDOS) of  $(4 \times 4)$ N-MoS<sub>2</sub> monolayer and their corresponding PDOS of Mo, S, and N atoms for a spin-up and spin-down states, respectively.

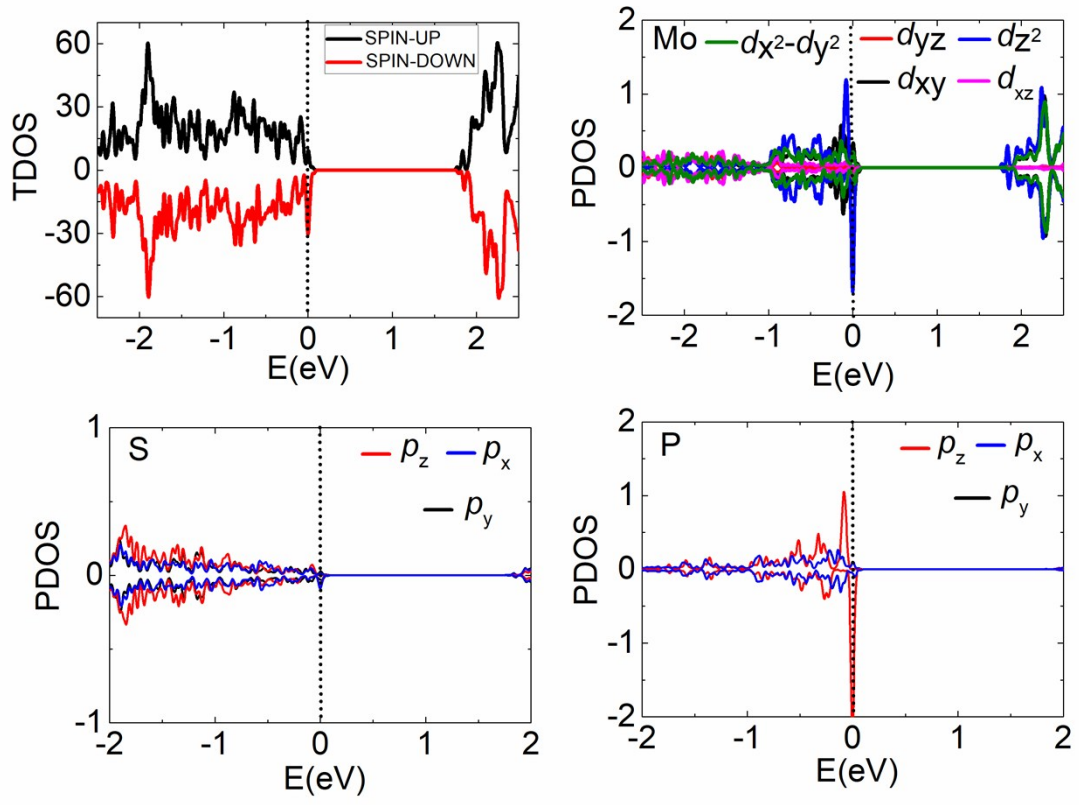

**Fig. S3.** The total electronic density of states (TDOS) of  $(4 \times 4)$ P-MoS<sub>2</sub> monolayer and their corresponding PDOS of Mo, S, and P atoms for a spin-up and spin-down states, respectively.

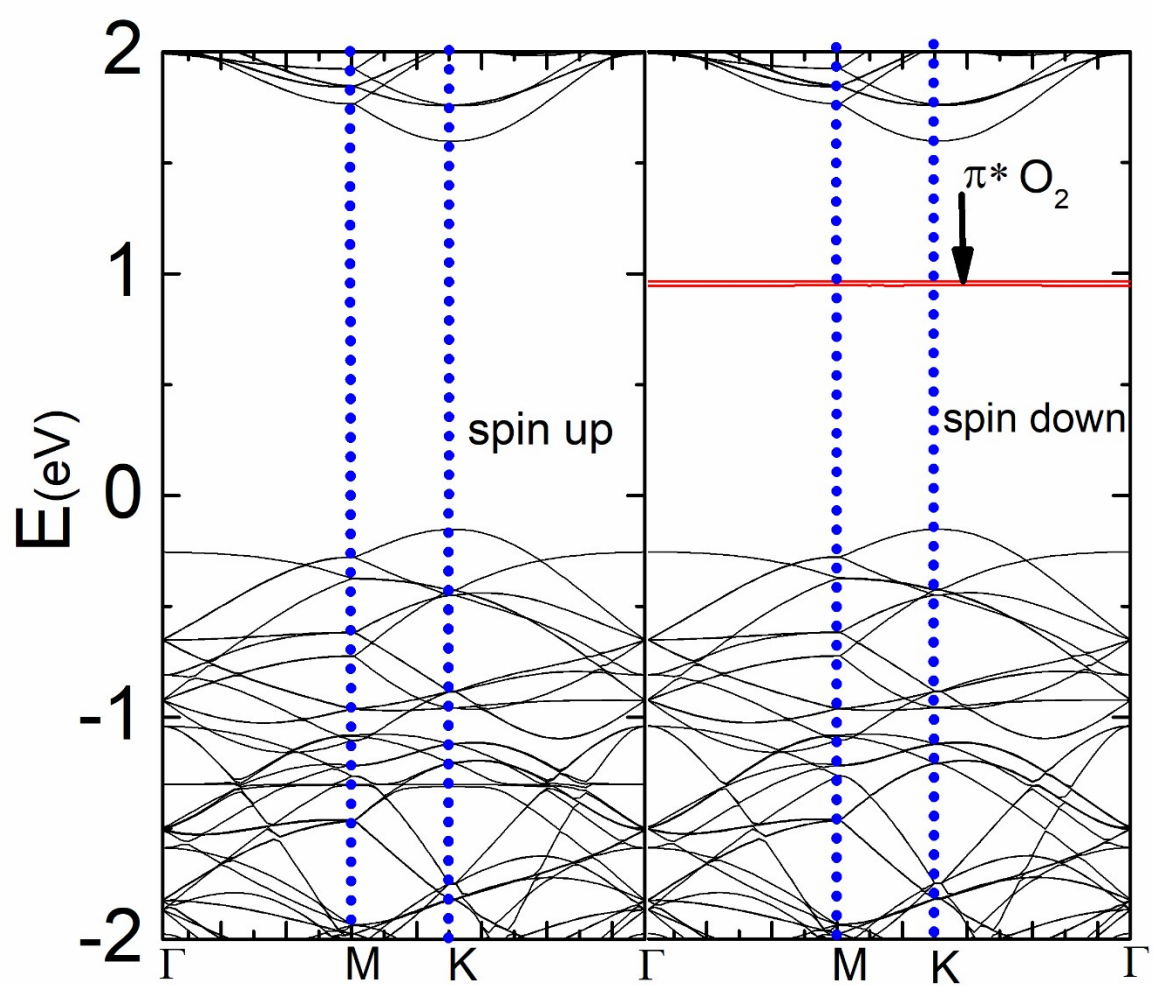

**Fig. S4.** Band structure of a  $(4 \times 4)\text{MoS}_2\text{-O}_2$  complex system for spin-up and spin-down states, respectively.

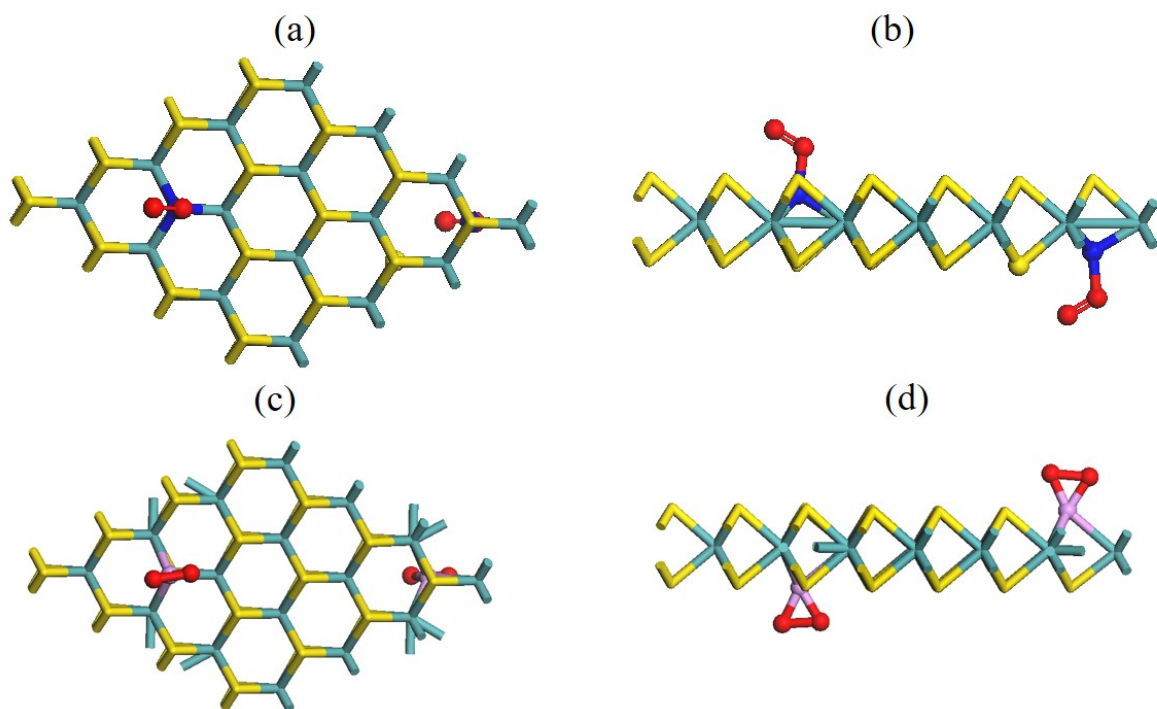

**Fig. S5.** Top (a,c) and side (b,d) view for the chemical structure of the 2N and 2P substituted MoS<sub>2</sub>-O<sub>2</sub> complex, violet, yellow, green, red and purple sticks represent Mo, S, N, O and P atoms, respectively.

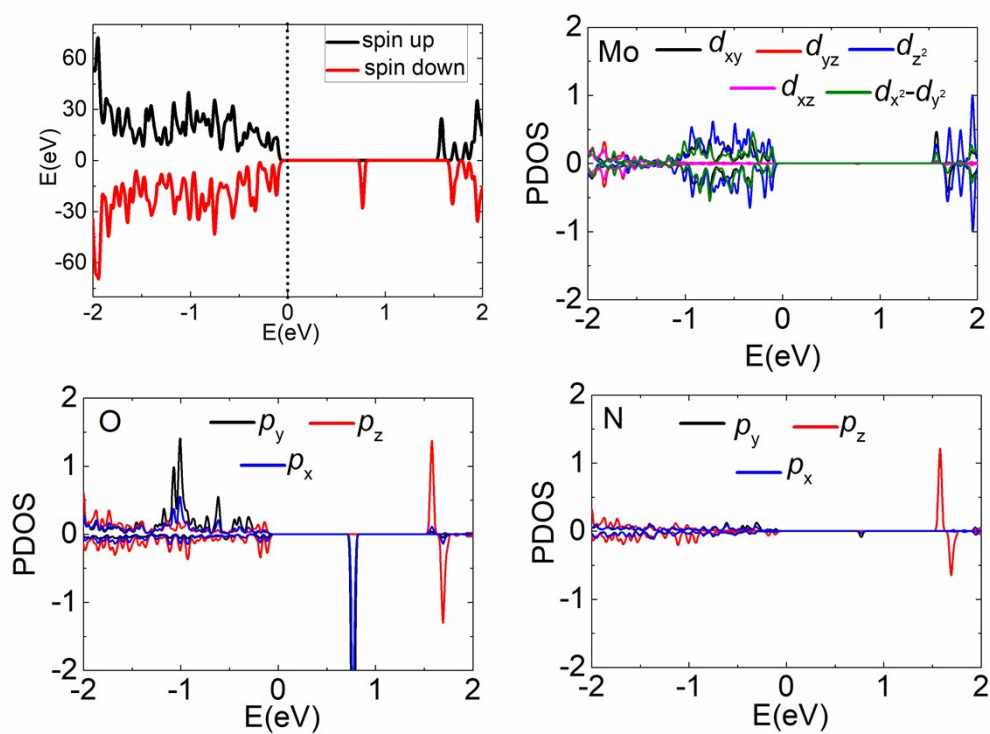

**Fig. S6.** The total electronic density of states (TDOS) of the  $(4 \times 4)\text{N-MoS}_2\text{-O}_2$  complex system and their corresponding PDOS of Mo, N, and O atoms for a spin-up and spin-down states, respectively.

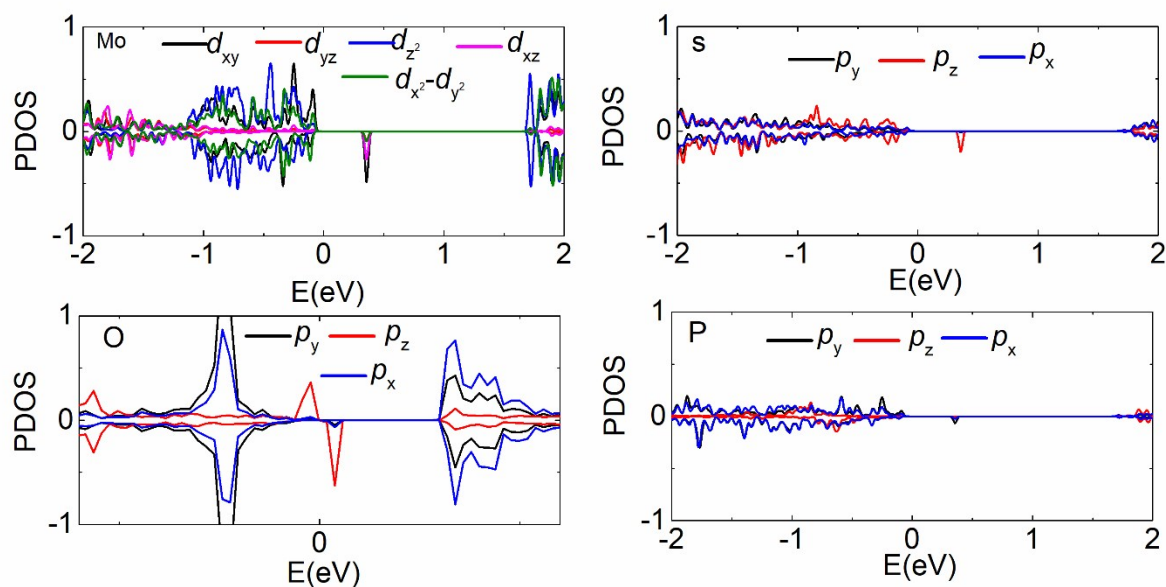

**Fig. S7** The (PDOS) of  $(4 \times 4)\text{P-MoS}_2\text{-O}_2$  complex corresponding Mo, S, P, and O atoms for a spin-up and spin-down states, respectively.

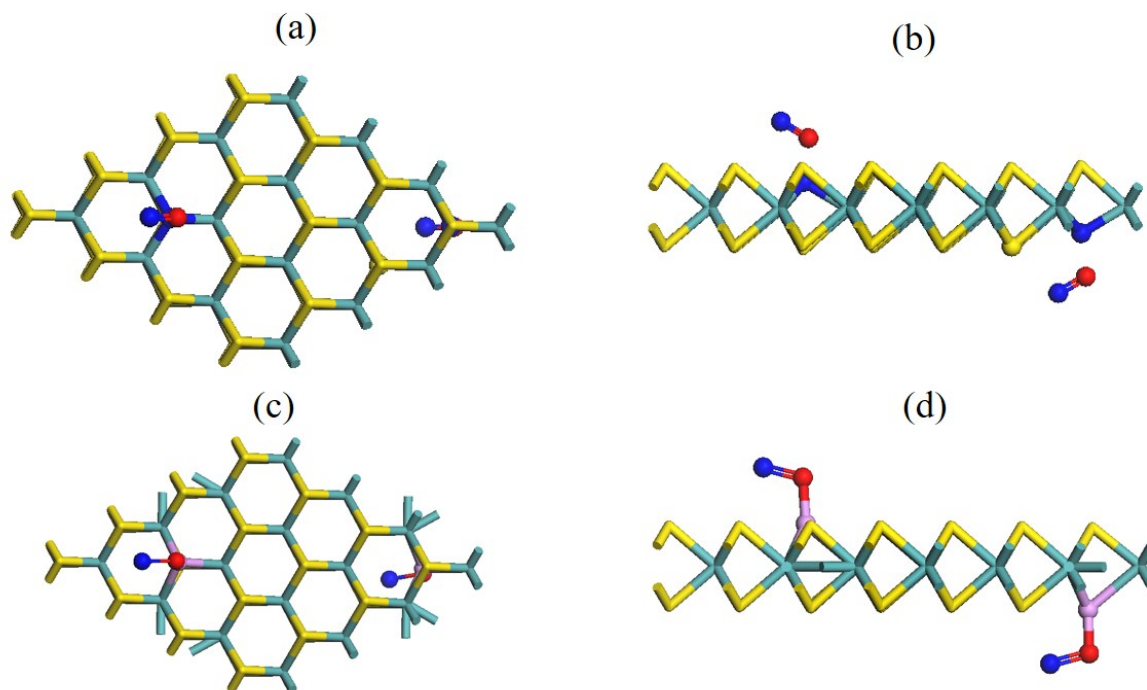

**Fig. S8** Top (a,c) and side (b,d) view for a chemical structure of the 2N and 2P substituted  $\text{MoS}_2\text{-NO}$  complex, violet, yellow, green, red and purple sticks represent the Mo, S, N, O and

P atoms, respectively.

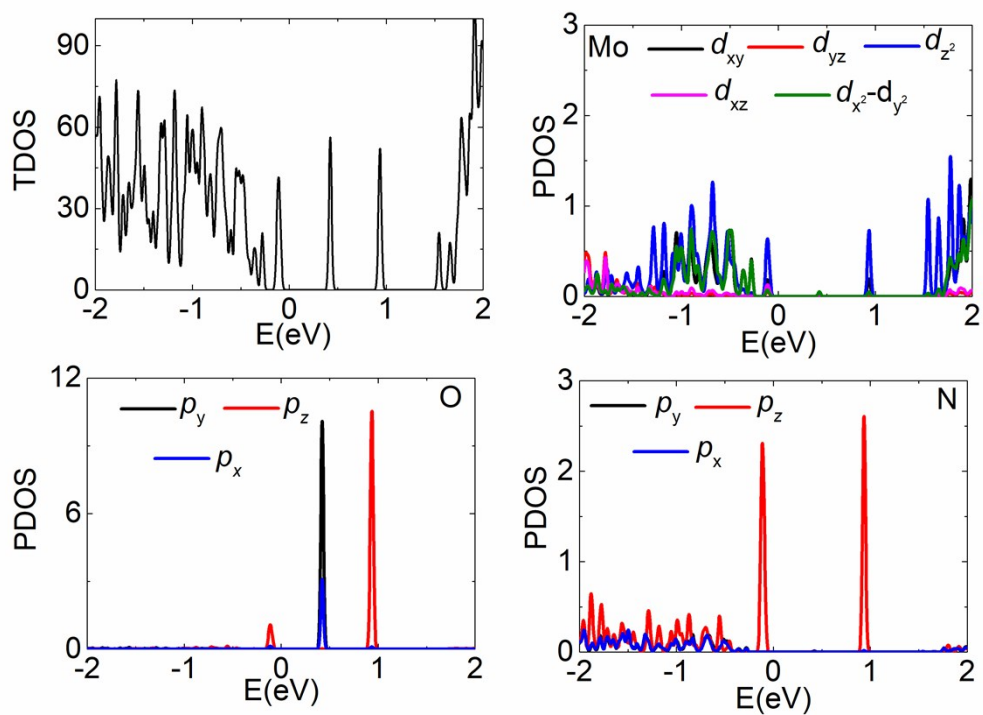

**Fig. S9.** The total electronic density of states (TDOS) of  $(4 \times 4)\text{N-MoS}_2\text{-NO}$  complex and their corresponding PDOS of Mo, N, and O atoms, respectively.

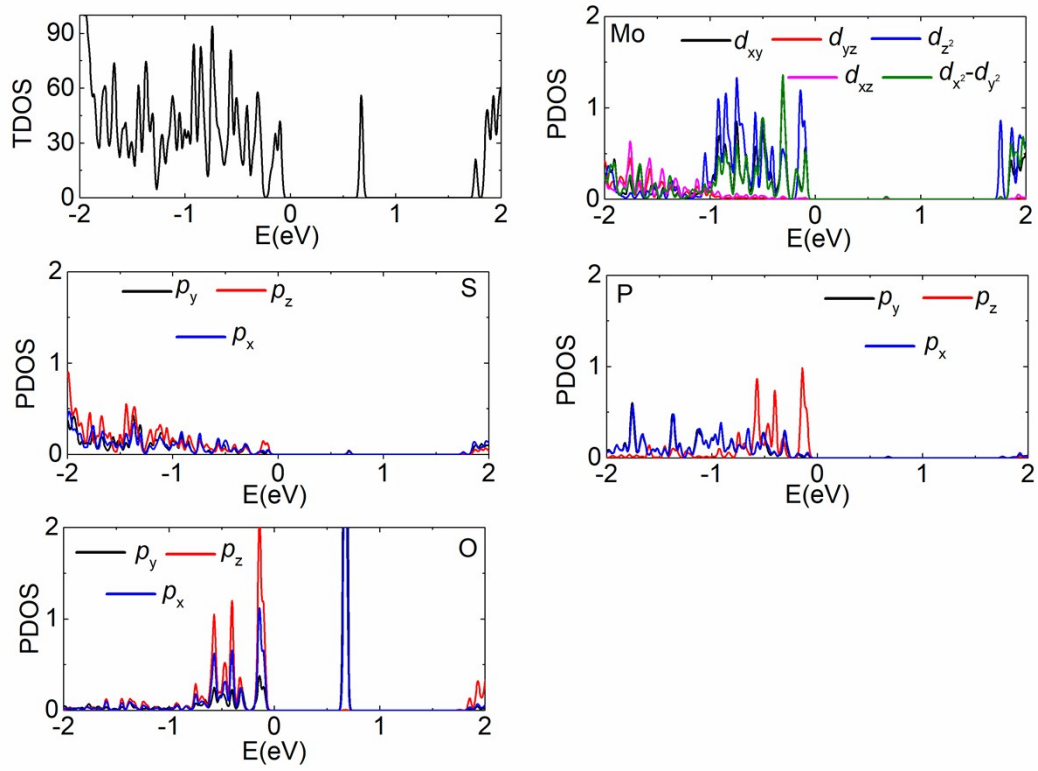

**Fig. S10** The total electronic density of states (TDOS) of  $(4 \times 4)$ P-MoS<sub>2</sub>-NO complex and their corresponding PDOS of Mo, S, P, and O atoms, respectively.
